# Supplementary material for: Rigid Polyethylene Terephthalate Packaging Waste: An Investigation of Waste Composition and Its Recycling Potential in Austria
Source: MDPI journal article supplement (doi:10.3390/resources12110128), 2023-10-31
Supplement: s1 [file s1]

Archive with 6 entries (6 files):
- Figure S1_Calculation points for projecting the waste and recycling potential.pdf
- Table S1_Applied formulas for the waste and recycling potential_.pdf
- Table S2_Applied data for the waste and recycling potential.pdf
- Table S3_Results - composition of rigid PET packaging waste.xlsx
- Table S4-S7_Results from manual sorting analysis.xlsx
- Table S8_Results - rigid PET packaging waste and circularity potential in Austria for 2020.xlsx
