# Supplementary material for: Rigid Polyethylene Terephthalate Packaging Waste: An Investigation of Waste Composition and Its Recycling Potential in Austria
Source: MDPI journal article supplement (doi:10.3390/resources12110128), 2023-10-31

**Figure S1: Calculation points for projecting the waste and recycling potential**

*Rigid PET packaging waste, Austria 2020*

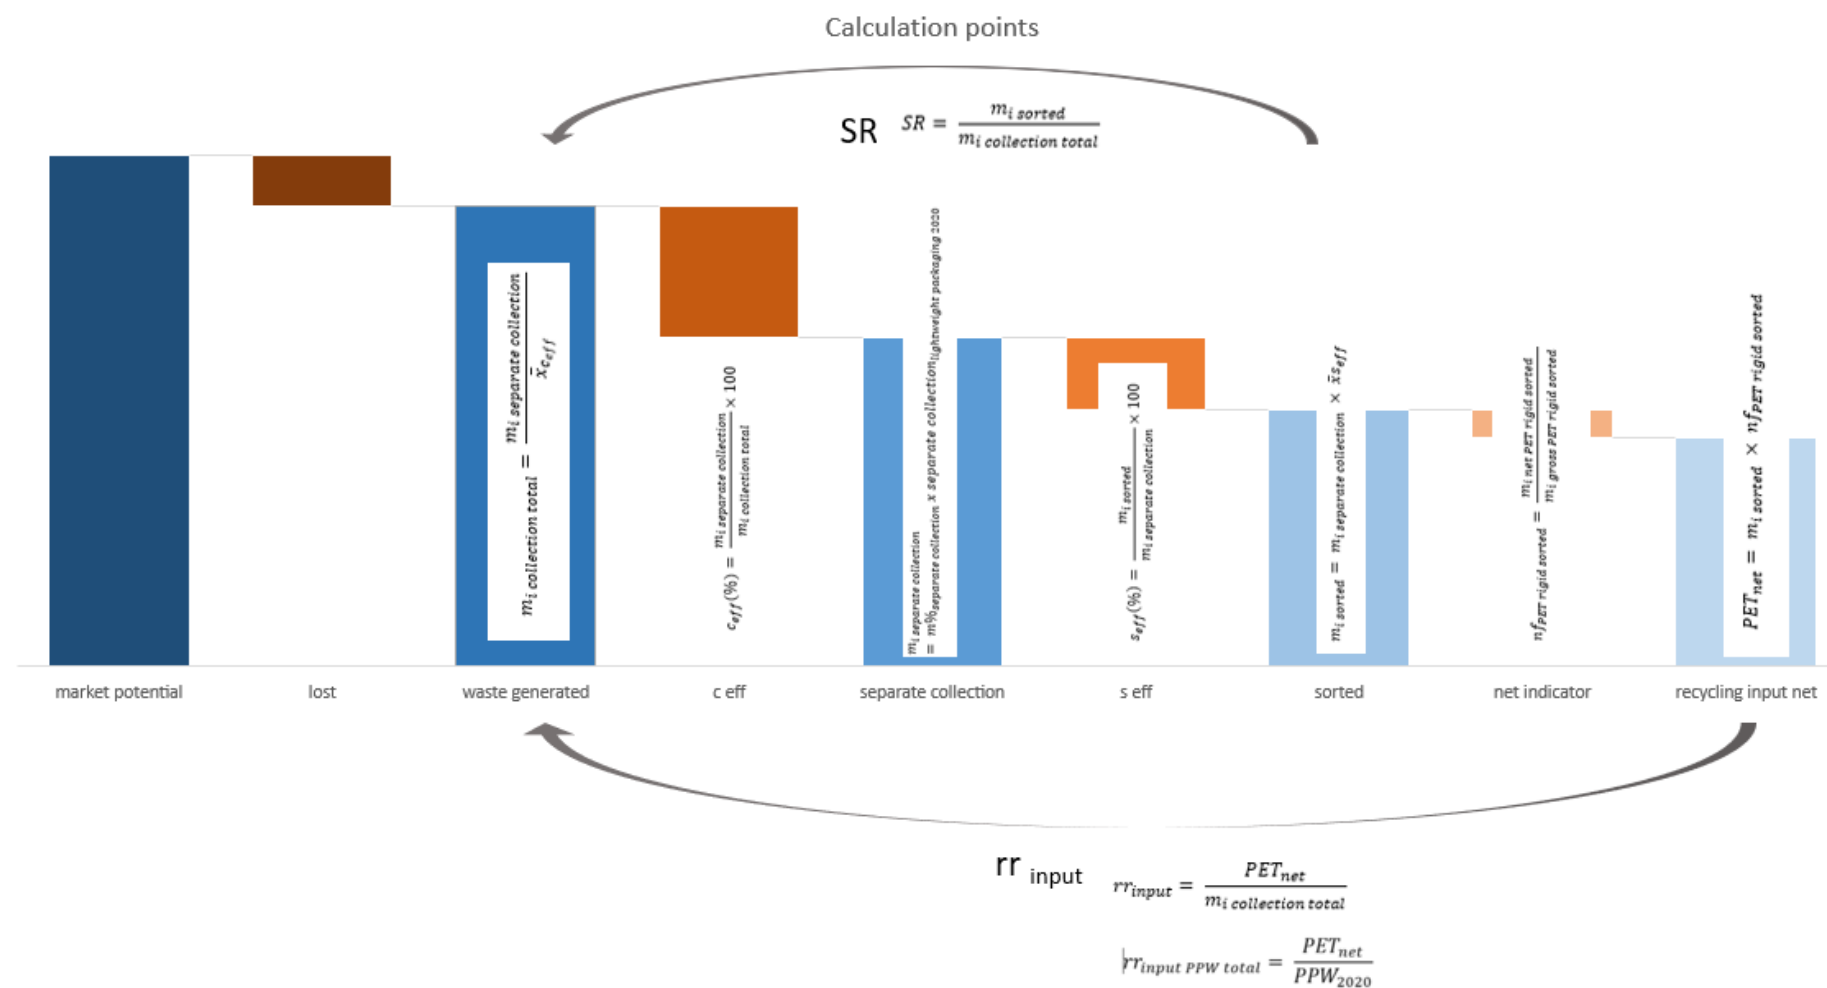

Supplement: s1 [file s1 › Figure S1_Calculation points for projecting the waste and recycling potential.pdf]
