# Supplementary material for: Rigid Polyethylene Terephthalate Packaging Waste: An Investigation of Waste Composition and Its Recycling Potential in Austria
Source: MDPI journal article supplement (doi:10.3390/resources12110128), 2023-10-31
Supplement: s1 [file s1 › Table S1_Applied formulas for the waste and recycling potential_.pdf]

**Table S1: Applied formulas for the extrapolation of the waste and recycling potential**

*Rigid PET packaging waste, Austria 2020*

| name                                                                       | indicator / formula                                                                                                                            | source            |
|----------------------------------------------------------------------------|------------------------------------------------------------------------------------------------------------------------------------------------|-------------------|
| separate collection                                                        | $m_{i \text{ separate collection}}$ $= m\%_{\text{separate collection}} \times \text{separate collection}_{\text{lightweight packaging 2020}}$ |                   |
| collection rate or collection efficiency or separate collection rate (SCR) | $c_{eff}(\%) = \frac{m_{i \text{ separate collection}}}{m_{i \text{ collection total}}} \times 100$                                            | [1]<br>[2]<br>[3] |
| weighed average collection efficiency                                      | $\bar{x}_{c_{eff}} = \sum_{i=1}^n (x_i \times \frac{m_i}{m_{total}})$                                                                          |                   |
| Total collection                                                           | $m_{i \text{ collection total}} = \frac{m_{i \text{ separate collection}}}{c_{eff}}$                                                           |                   |
| Other collection (MSW)                                                     | $m_{i \text{ other collection}} = m_{i \text{ collection total}} - m_{i \text{ separate collection}}$                                          |                   |
| sorting efficiency                                                         | $s_{eff}(\%) = \frac{m_{i \text{ sorted}}}{m_{i \text{ separate collection}}} \times 100$                                                      | [2]               |
| Weighed average sorting efficiency                                         |                                                                                                                                                |                   |

|                                             |                                                                                                                            |                   |
|---------------------------------------------|----------------------------------------------------------------------------------------------------------------------------|-------------------|
|                                             | $\bar{x}_{seff} = \sum_{i=1}^n (x_i \times \frac{m_i}{m_{total}})$                                                         |                   |
| sorting rate                                | $SR = \frac{m_{i \text{ sorted}}}{m_{i \text{ collection total}}}$                                                         | [2],<br>[4]       |
| Sorting volume gross                        | $m_{i \text{ sorted}} = m_{i \text{ separate collection}} \times S_{eff}$                                                  |                   |
| rigid PET net quantity indicator            | $nf_{PET \text{ rigid sorted}}(nf_{SO}) = \frac{m_{i \text{ net PET rigid sorted}}}{m_{i \text{ gross PET rigid sorted}}}$ |                   |
| PET net = recycling facility input material | $PET_{net} = m_{i \text{ sorted}} \times nf_{PET \text{ rigid sorted}}$                                                    |                   |
| ALR (average loss rate)                     | $ALR_{PET \text{ rigid sorted}} = 1 - nf_{PET \text{ rigid sorted}}$                                                       |                   |
| recycling rate input                        | $rr_{input} = \frac{PET_{net}}{m_{i \text{ collection total}}}$                                                            | [5]<br>[3]<br>[4] |
| recycling rate PPW total                    | $rr_{input \text{ PPW total}} = \frac{PET_{net}}{PPW_{2020}}$                                                              |                   |

## References

1. Haupt, M.; Vadenbo, C.; Hellweg, S. Do We Have the Right Performance Indicators for the Circular Economy?: Insight into the Swiss Waste Management System. *Journal of Industrial Ecology* **2017**, *21*, 615–627, doi:10.1111/jiec.12506.
2. Van Eygen, E.; Laner, D.; Fellner, J. Circular economy of plastic packaging: Current practice and perspectives in Austria. *Waste Manag.* **2018**, *72*, 55–64, doi:10.1016/j.wasman.2017.11.040.
3. Schmidt, S.; Laner, D.; Van Eygen, E.; Stanisavljevic, N. Material efficiency to measure the environmental performance of waste management systems: A case study on PET bottle recycling in Austria, Germany and Serbia. *Waste Manag.* **2020**, *110*, 74–86, doi:10.1016/j.wasman.2020.05.011.

4. Packforce. *Kunststoff-Verpackungen In Österreich: Kreislaufwirtschaft und Nachhaltigkeitsbewertung*, Wien, 2022. Available online: <https://www.fh-campuswien.ac.at/studium-weiterbildung/aktuell/news-und-events/kunststoff-studie-kreislaufwirtschaft-und-nachhaltigkeitsbewertung.html> (accessed on 7 March 2023).
5. *European Commission. COMMISSION IMPLEMENTING DECISION (EU) 2019/665 of 17 April 2019 amending Decision 2005/270/EC establishing the formats relating to the database system pursuant to European Parliament and Council Directive 94/62/EC on packaging and packaging waste (notified under document C(2019) 2805) (Text with EEA relevance)*, 2019. Available online: <https://eur-lex.europa.eu/legal-content/EN/TXT/HTML/?uri=CELEX:32019D0665&from=EN> (accessed on 7 March 2023).
