# Supplementary material for: Rigid Polyethylene Terephthalate Packaging Waste: An Investigation of Waste Composition and Its Recycling Potential in Austria
Source: MDPI journal article supplement (doi:10.3390/resources12110128), 2023-10-31
Supplement: s1 [file s1 › Table S2_Applied data for the waste and recycling potential.pdf]

**Table S2: Applied data for the waste and recycling potential***Rigid PET packaging waste, Austria 2020*

| <b>data name long</b>                                                | <b>data name short</b>                         | <b>data &amp; source</b> | <b>source</b> |
|----------------------------------------------------------------------|------------------------------------------------|--------------------------|---------------|
| plastic packaging waste generation 2020                              | PPW <sub>2020</sub>                            | 299,140 t                | [1]           |
| separate collection households lightweight packaging 2020            | separate collection lightweight packaging 2020 | 159,131 t                | [2]           |
| collection efficiency $c_{eff}$ PET rigid others packaging waste     | collection efficiency PET rigid others         | 55 %                     | [3]           |
| collection efficiency $c_{eff}$ PET bottles packaging waste          | collection efficiency PET bottles              | 65 %                     | [3]           |
| collection efficiency $c_{eff}$ PET beverage bottles packaging waste | collection efficiency PET beverage bottles     | 83 %                     | [4]           |
| sorting efficiency $s_{eff}$ PET rigid others packaging waste        | sorting efficiency PET rigid others            | 24 %                     | [3]           |
| sorting efficiency $s_{eff}$ PET bottles packaging waste             | sorting efficiency PET bottles                 | 83 %                     | [3]           |
| recycling efficiency $r_{eff}$ PET rigid others packaging waste      | recycling efficiency PET rigid others          | 78 %                     | [3]           |
| recycling efficiency $r_{eff}$ PET bottles packaging waste           | recycling efficiency PET bottles               | 83 %                     | [3]           |

## References

1. BMK. Bundes-Abfallwirtschaftsplan (BAWP) 2023: Teil 1. Available online: [https://www.bmk.gv.at/themen/klima\\_umwelt/abfall/aws/bundes\\_awp/bawp2023.html](https://www.bmk.gv.at/themen/klima_umwelt/abfall/aws/bundes_awp/bawp2023.html) (accessed on 7 March 2023).
2. Altstoff Recycling Austria. Stoffströme: Sortierung und Verwertung - Rohstoffe erfolgreich im Kreislauf halten. Kennzahlen Materialströme - Circular Economy. Available online: <https://transparenzbericht.ara.at/was-uns-ausmacht/stoffstroeme/#sortierung-und-verwertung> (accessed on 16 March 2023).
3. Van Eygen, E.; Laner, D.; Fellner, J. Circular economy of plastic packaging: Current practice and perspectives in Austria. *Waste Manag.* **2018**, *72*, 55–64, doi:10.1016/j.wasman.2017.11.040.
4. WKÖ. *Gesellschaftliche Verantwortung: Nachhaltigkeitsagenda für Getränkeverpackungen*, 2021. Available online: [https://www.wko.at/service/netzwerke/Umsetzungsberichte\\_zur\\_Nachhaltigkeitsagenda\\_und\\_zur\\_Zusat.html](https://www.wko.at/service/netzwerke/Umsetzungsberichte_zur_Nachhaltigkeitsagenda_und_zur_Zusat.html) (accessed on 16 March 2023).
