# Supplementary material for: Rigid Polyethylene Terephthalate Packaging Waste: An Investigation of Waste Composition and Its Recycling Potential in Austria
Source: MDPI journal article supplement (doi:10.3390/resources12110128), 2023-10-31
Supplement: s1 [file s1 › Table S3_Results - composition of rigid PET packaging waste.xlsx]

## Sheet: S3-Composition PET PW
Supplementary Material
Table S3 - Results - Composition of separately collected rigid PET packaging waste (collected rigid PET) and the mixed PET sorting output (sorted rigid PET)
Austria, 2020
Packaging categories and results correspond to Figures 2 to 5 and Table 1 and 3 presented in the main article as well as Tables S 4 to S 7 in Supplementary Materials.
SEPARATE COLLECTION collected rigid PET	composition Yellow Bag (gross weight)		PET rigid packaging x											Coloration (gross w/o residues)													Problem area - decoration (gross w/o residues)											Problem area - multicomponents (gross w/o residues)
Packaging category	gross weight [g]	share on total [mass-%]	gross weight [g]	share on total [mass-%]	residues [g]	share on total [mass-%]	gross weight w/o residues	closures [g]	share on total [mass-%]	non-PET components [g]	share on total [mass-%]	net weight [g]	share on total [mass-%]	black [g]	share on black [mass-%]					nature [g]	share on nature [mass-%]	other colour [g]	share on other colour [mass-%]	white [g]	share on white [mass-%]	Total	no decoration [g]	share on no decoration [mass-%]	direct print [g]	share on direct print [mass-%]	label/sleeve £50% [g]	share on label/sleeve £50% [mass-%]	label/sleeve >50% [g]	share on label/sleeve >50% [mass-%]	weight of label [g]	weight of sleeve [g]	Total	packaging with MC [g]	packaging w/o MC [g]	weight of MC [g]	absorbent pads [g]
Impurities	127352	0.201781	0	0	0	0	0	0	0	0	0	0	0	0	0					0	0	0	0	0	0	0	0	0	0	0	0	0	0	0	0	0	0	0	0	0	0
Non-PET	320498	0.507808	0	0	0	0	0	0	0	0	0	0	0	0	0					0	0	0	0	0	0	0	0	0	0	0	0	0	0	0	0	0	0	0	0	0	0
PET	183290	0.290411	0	0	0	0	0	0	0	0	0	0	0	0	0					0	0	0	0	0	0	0	0	0	0	0	0	0	0	0	0	0	0	0	0	0	0
Bottles Beverage	111067	0.175978	0	0	0	0	0	0	0	0	0	0	0	0	0					0	0	0	0	0	0	0	0	0	0	0	0	0	0	0	0	0	0	0	0	0	0
Bottles Food	14743.3	0.0233598	14743.3	0.204136	1785.2	0.620961	12958.1	1066.47	0.165928	560.233	0.260473	11331.4	0.186464	42.534	0.0317897					8203.91	0.150777	707.994	0.106514	4003.66	0.575879	12958.1	241.7	0.764631	0	0	6052.63	0.363787	6663.77	0.679321	90.64	469.52	12958.1	0	0	0	0
Bottles Non-Food	14388	0.0227968	14388	0.199217	582.7	0.202685	13805.3	2136.18	0.332361	289.199	0.134459	11379.9	0.187263	521.9	0.390066					9294.92	0.170828	2852.98	0.429217	1135.5	0.163328	13805.3	74.4	0.235369	0	0	10585.2	0.636213	3145.68	0.320679	131.658	157.5	13805.3	0	0	0	0
PET others	1730.3	0.00274154	1730.3	0.0239578	59	0.0205225	1671.3	0	0	69.1	0.0321271	1602.2	0.026365	0	0					1438.4	0.0264359	213	0.0320448	19.9	0.00286238	1671.3	0	0	0	0	0	0	0	0	0	0	0	258.3	1413	69.1	0
Trays Food w/o id	3011.37	0.00477132	3011.37	0.0416956	39.6922	0.0138065	2971.68	42.3401	0.00658754	63.256	0.02941	2866.09	0.0471629	66.555	0.0497429					2497.54	0.0459015	354.949	0.0534003	52.6402	0.00757167	2971.68	0	0	0	0	0	0	0	0	0	0	0	174.037	2797.65	38.8572	24.3988
Trays Mono Food	15653.2	0.0248015	15653.2	0.216735	234.108	0.0814316	15419.1	209.681	0.0326235	351.144	0.16326	14858.3	0.244501	372.291	0.278249					13135	0.241403	1684.92	0.253487	226.96	0.0326455	15419.1	0	0	0	0	0	0	0	0	0	0	0	774.177	14644.9	224.343	126.801
Trays Mono Non-Food	5278.8	0.0083639	5278.8	0.0730904	78.7	0.0273749	5200.1	1.4	0.000217821	558.7	0.25976	4640	0.0763536	256.4	0.191632					4405.49	0.0809672	217.005	0.0326474	321.2	0.0462008	5200.1	0	0	0	0	0	0	0	0	0	0	0	1284.9	3915.2	558.7	0
Trays Multi Food	17417.9	0.0275975	17417.9	0.241169	95.5	0.0332185	17322.4	2971.23	0.462283	259.2	0.120512	14092	0.231891	78.3	0.058521					15435.6	0.283686	616.1	0.0926892	1192.4	0.171513	17322.4	0	0	0	0	0	0	0	0	0	0	0	0	17322.4	0	259.2
Trays Multi Non-Food	0	0	0	0	0	0	0	0	0	0	0	0	0		0						0		0		0		0	0	0	0	0	0	0	0	0	0	0	0	0	0	0
Total	631141	1	72222.9	1	2874.9	1	69348	6427.3	1	2150.83	1	60769.9	1	1337.98	1					54410.8	1	6646.95	1	6952.26	1	69348	316.1	1	0	0	16637.8	1	9809.45	1	222.298	627.02	26763.4	2491.41	40093.2	891	410.4
SORTING OUTPUT sorted rigid PET	composition PET sorting output (gross weight)		PET rigid packaging											Coloration (gross w/o residues)													Problem area - decoration (gross w/o residues)											Problem area - multicomponents (gross w/o residues)
Packaging category	gross weight [g]	share on total [mass-%]	gross weight [g]	share on total [mass-%]	residues [g]	share on total [mass-%]	gross weight w/o residues	closures [g]	share on total [mass-%]	non-PET components [g]	share on total [mass-%]	net weight [g]	share on total [mass-%]	black [g]	share on black [mass-%]	blue	share on blue [mass-%]	green	share on green [mass-%]	nature [g]	share on nature [mass-%]	other colour [g]	share on other colour [mass-%]	white [g]	share on white [mass-%]	Total	no decoration [g]	share on no decoration [mass-%]	direct print [g]	share on direct print [mass-%]	label/sleeve ≤50% [g]	share on label/sleeve ≤50% [mass-%]	label/leeve >50% [g]	share on label/sleeve >50% [mass-%]	weight of label [g]	weight of sleeve [g]	Total	packaging with MC [g]	packaging w/o MC [g]	weight of MC [g]	absorbent pads [g]
Impurities	2429	0.0139109	0	0	0	0	0	0	0	0	0	0	0	0	0	0	0	0	0	0	0	0	0	0	0	0	0	0	0	0	0	0	0	0	0	0	0	0	0	0	0
Non-PET	8454.9	0.0484213	0	0	0	0	0	0	0	0	0	0	0	0	0	0	0	0	0	0	0	0	0	0	0	0	0	0	0	0	0	0	0	0	0	0	0	0	0	0	0
PET	163727	0.937668	0	0	0	0	0	0	0	0	0	0	0	0	0	0	0	0	0	0	0	0	0	0	0	0	0	0	0	0	0	0	0	0	0	0	0	0	0	0	0
Bottles Beverage	19899.5	0.113965	19899.5	0.121541	189.3	0.163302	19710.2	1495.11	0.108541	635.474	0.181809	17579.6	0.12099	366.9	0.207539	1382.42	1	682.983	1	13781.2	0.105194	3031.64	0.17744	465.3	0.0437217	19710.4	1987.17	0.268367	23	0.230613	12789.1	0.170266	4911	0.176001	380.317	254.94	19710.3	0	0	0	0
Bottles Food	41444.1	0.237351	41444.1	0.253129	374.7	0.32324	41069.4	3224.01	0.234056	1407.71	0.402745	36437.7	0.250778	154.05	0.0871393	0	0	0	0	32382.8	0.247184	2011.53	0.117734	6520.48	0.612694	41068.8	4164.2	0.562375	42.1	0.422122	24333.9	0.323966	12529	0.449017	515.077	891.323	41069.2	0	0	0	0
Bottles Non-Food	50040.9	0.286585	50040.9	0.305636	299.8	0.258627	49741.1	5627.5	0.408544	1101.1	0.315025	43012.5	0.296029	1083.11	0.612667	0	0	0	0	36735.6	0.28041	10516.5	0.615525	1405.9	0.132105	49741.1	1253.3	0.169258	34.6343	0.347265	37989.6	0.505769	10463.2	0.374982	622.649	478.528	49740.7	0	0	0	0
PET others	1652	0.00946102	1652	0.0100899	38.9	0.0335576	1613.1	0	0	34.4	0.00984184	1578.7	0.0108652		0	0	0	0	0	1572.2	0.0120009	40.9	0.00239386	0	0	1613.1	0	0	0	0	0	0	0	0	0	0	0	262	1351.1	34.4
Trays Food w/o id	4424.87	0.0253412	4424.87	0.0270258	25.2384	0.0217723	4399.63	57.7765	0.00419444	23.6153	0.00675633	4318.24	0.0297198	18.3915	0.0104033	0	0	0	0	4221.21	0.0322213	123.851	0.00724896	36.1699	0.00339869	4399.63	0	0	0	0	0	0	0	0	0	0	0	2.35937	4397.27	0.219756	23.3955
Trays Mono Food	26169.2	0.149871	26169.2	0.159834	145.062	0.125139	26024.2	339.673	0.0246595	139.085	0.0397921	25545.4	0.175814	107.208	0.0606432	0	0	0	0	24677	0.188364	990.786	0.0579902	249.159	0.0234121	26024.2	0	0	0	0	0	0	0	0	0	0	0	18.8459	26005.3	1.28024	137.804
Trays Mono Non-Food	3515.8	0.020135	3515.8	0.0214735	17.9	0.0154417	3497.9	0	0	104.8	0.0299833	3393.1	0.0233526	0	0	0	0	0	0	3315	0.025304	36.5	0.00213633	146.4	0.0137564	3497.9	0	0	0	0	0	0	0	0	0	0	0	349.1	3148.8	104.8
Trays Multi Food	16580.9	0.094959	16580.9	0.101271	68.3	0.0589199	16512.6	3030.46	0.220004	49.1	0.0140475	13433	0.0924515	38.2	0.0216081	0	0	0	0	14321.8	0.109321	333.7	0.0195313	1818.9	0.170912	16512.6	0	0	0	0	0	0	0	0	0	0	0	0	16512.6	0	49.1
Trays Multi Non-Food	0	0	0	0	0	0	0	0	0	0	0	0	0		0	0	0	0	0		0		0		0	0	0	0	0	0	0	0	0	0	0	0	0	0	0	0	0
Total	174611	1	163727	1	1159.2	1	162568	13774.5	1	3495.28	1	145298	1	1767.86	1	1382.42	1	682.983	1	131007	1	17085.4	1	10642.3	1	162568	7404.67	1	99.7343	1	75112.6	1	27903.2	1	1518.04	1624.79	110520	632.305	51415.1	140.7	210.3
