# Supplementary material for: Rigid Polyethylene Terephthalate Packaging Waste: An Investigation of Waste Composition and Its Recycling Potential in Austria
Source: MDPI journal article supplement (doi:10.3390/resources12110128), 2023-10-31
Supplement: s1 [file s1 › Table S4-S7_Results from manual sorting analysis.xlsx]

## Sheet: S4_residues
Supplementary Material
Table S4 - Results - Residues
Results of the manual sorting analysis towards residues in separately collected and sorted rigid PET waste streams
Packaging categories and results correspond to Table 3 in the main article.
collected rigid PET (separate collection)	residues [g] / PPW [kg]	share of residues on gross packaging waste weight [mass-%]	share of residues contained packaging units on total packaging units [mass-%]	average residues in g per packaging unit containing residues [g/unit]	average residues per packaging unit [g/unit]
PET Total	39.8059	0.0398059	0.110269	21.9458	2.41995
beverage bottles	-	-	-	-	-
food bottles	121.086	0.121086	0.134565	35.0039	4.71029
non-food bottles	40.499	0.040499	0.201031	14.941	3.00361
PET others	34.0981	0.0340981	0.416667	11.8	4.91667
food trays w/o id	13.1807	0.0131807	0.0838284	9.79376	0.820995
food mono trays	14.9559	0.0149559	0.0757163	11.1761	0.846213
non-food mono trays	14.9087	0.0149087	0.25	15.74	3.935
food multi trays	5.48286	0.00548286	0.0232558	15.9167	0.370155
sorted rigid PET	residues [g] / PPW [kg]	share of residues on gross packaging waste weight [mass-%]	share of residues contained packaging units on total packaging units [mass-%]	average residues in g per packaging unit containing residues [g/unit]	average residues per packaging unit [g/unit]
PET Total	7.08007	0.00708007	0.0348309	16.8	0.585159
beverage bottles	9.5128	0.0095128	0.0371622	17.2091	0.639527
food bottles	9.04109	0.00904109	0.0516854	16.2913	0.842022
non-food bottles	5.9911	0.0059911	0.0231959	16.6556	0.38634
PET others	23.5472	0.0235472	0.04	38.9	1.556
food trays w/o id	5.70377	0.00570377	0.0309893	19.1751	0.594222
food mono trays	5.54321	0.00554321	0.0260003	18.8789	0.490857
non-food mono trays	5.0913	0.0050913	0.181818	4.475	0.813636
food multi trays	4.1192	0.0041192	0.0379747	22.7667	0.864557

## Sheet: S5_bottles problem areas
Supplementary Material
Table S5a+b - Results - problem areas: bottles
Results of the manual sorting analysis towards problem areas of PET bottles contained in separately collected and sorted rigid PET waste streams
Packaging categories and results correspond to Figure 4 in the main article and Table S3-a and S3-b in Supplementary materials.
S5_b: Decoration and degree of packaging coverage
Total	collected rigid PET bottles			sorted rigid PET bottles
	food bottles	non-food bottles		beverage bottles	food bottles	non-food bottles
	[g]	[g]		[g]	[g]	[g]
direct print	0	0		23	42.1	34.6343
label/sleeve ≤50%	6052.63	10585.2		12789.1	24333.9	37989.6
undecorated	241.7	74.4		1987.17	4164.2	1253.3
label/sleeve >50%	6663.77	3145.68		4911	12529	10463.2
total	12958.1	13805.3	0	19710.3	41069.2	49740.7
Total	collected rigid PET bottles			sorted rigid PET bottles
	food bottles	non-food bottles		beverage bottles	food bottles	non-food bottles
	[mass-%]	[mass-%]		[mass-%]	[mass-%]	[mass-%]
direct print	0	0		0.00116691	0.00102509	0.00069629
label/sleeve ≤50%	0.467093	0.76675		0.648858	0.592507	0.763747
undecorated	0.0186524	0.00538923		0.100819	0.101394	0.0251965
label/sleeve >50%	0.514255	0.227861		0.24916	0.305069	0.210353
total	1	1	0	1	0.999995	0.999993
S5_a: Weight and share of decoration
Total	collected rigid PET bottles			sorted rigid PET bottles
	food bottles	non-food bottles		beverage bottles	food bottles	non-food bottles
	[g]	[g]		[g]	[g]	[g]
label	90.64	131.658		380.317	515.077	622.649
sleeve	469.52	157.5		254.94	891.323	478.528
total	560.16	289.158		635.257	1406.4	1101.18
packaging gross weight	14743.3	14388		19899.5	41444.1	50040.9
packaging weight w/o residues	12958.1	13805.3		19710.2	41069.4	49741.1
	collected rigid PET bottles			sorted rigid PET bottles
share of decoration on packaging	food bottles	non-food bottles		beverage bottles	food bottles	non-food bottles
	[mass-%]	[mass-%]		[mass-%]	[mass-%]	[mass-%]
[gross weight]	0.0379942	0.0200972		0.0319232	0.0339349	0.0220055
[w/o residues]	0.0432286	0.0209455		0.0322298	0.0342445	0.0221382

## Sheet: S6_trays problem areas
Supplementary Material
Table S6 - Results - problem areas: trays
Results of the manual sorting analysis towards problem areas of PET trays contained in separately collected and sorted rigid PET waste streams
Share of trays with or without other material components (multimaterial) based on packaging weight without residues.
Packaging categories and results correspond to Table S3-a and S3-b in Supplementary materials.
collected rigid PET	packaging gross w/o residues	pack w/o MC	pack with MC	MC	absorbent pads		sorted rigid PET	packaging gross w/o residues	pack w/o MC	pack with MC	MC	absorbent pads
	[g]	[g]	[g]	[g]	[g]			[g]	[g]	[g]	[g]	[g]
PET others	1671.3	1413	258.3	69.1	0		PET others	1613.1	1351.1	262	34.4	0
food trays w/o id	2971.68	2797.65	174.037	38.8572	24.3988		food trays w/o id	4399.63	4397.27	2.35937	0.219756	23.3955
food mono trays	15419.1	14644.9	774.177	224.343	126.801		food mono trays	26024.2	26005.3	18.8459	1.28024	137.804
non-food mono trays	5200.1	3915.2	1284.9	558.7	0		non-food mono trays	3497.9	3148.8	349.1	104.8	0
food multi trays	17322.4	17322.4	0	0	259.2		food multi trays	16512.6	16512.6	0	0	49.1
PET trays Total	42584.6	40093.2	2491.41	891	410.4		PET trays Total	52047.4	51415.1	632.305	140.7	210.3
collected rigid PET	w/o MC [mass-%]	MC [mass-%]	weight of other packaging materials [mass-%] 1)	weight of other packaging materials on total packaging [mass-%] 2)	weight of absorbent pads on total packaging [mass-%] 3)		sorted rigid PET	w/o MC [mass-%]	MC [mass-%]	weight of other packaging materials [mass-%] 1)	weight of other packaging materials on total packaging [mass-%] 2)	weight of absorbent pads on total packaging [mass-%] 3)
PET others	0.84545	0.15455	0.267518	0.0413451	0		PET others	0.83758	0.16242	0.131298	0.0213254	0
food trays w/o id	0.941435	0.0585653	0.22327	0.0130758	0.00821042		food trays w/o id	0.999464	0.000536266	0.0931419	4.99488e-05	0.00531762
food mono trays	0.949791	0.0502089	0.289782	0.0145496	0.00822364		food mono trays	0.999276	0.000724168	0.0679323	4.91944e-05	0.00529525
non-food mono trays	0.752909	0.247091	0.43482	0.10744	0		non-food mono trays	0.900197	0.0998027	0.300201	0.0299608	0
food multi trays	1	0	-	0	0.0149633		food multi trays	1	0	-	0	0.00297349
PET trays Total	0.941495	0.058505	0.357628	0.0209231	0.00963728		PET trays Total	0.987851	0.0121486	0.222519	0.00270331	0.00404055
Legend:
1) weight share of other material components [MC] in relation to packaging with other material components [pack with MC]
2) weight share of other material components [MC] on total tray packaging [packaging gross w/o residues]
3) weight share of absorbent pads [absorbent pads] on total packaging weight [gross w/o residues]

## Sheet: S7_net quantity indicators
Supplementary Material
Table S7 - Results - net quantity indicators
Results of the manual sorting analysis towards net quantity indicators in separately collected and sorted rigid PET waste streams
Packaging categories and results correspond to Figure 5 in the main article as well as Table S3-a and S3-b in Supplementary materials.
collected rigid PET
	PET total	PET target categories	Bottles total	Trays total	food bottles	non-food bottles	food mono trays	non-food mono trays	food w/o id trays	food multi trays	PET others
	[g]
gross weight	72222.9	50063.3	29131.3	41361.3	14743.3	14388	15653.2	5278.8	3011.37	17417.9	1730.3
residues	2874.9	2680.71	2367.9	448	1785.2	582.7	234.108	78.7	39.6922	95.5	59
closures	6427.3	3413.73	3202.65	3224.65	1066.47	2136.18	209.681	1.4	42.3401	2971.23	0
non-PET	2150.83	1759.28	849.432	1232.3	560.233	289.199	351.144	558.7	63.256	259.2	69.1
net weight	60769.9	42209.6	22711.3	36456.4	11331.4	11379.9	14858.3	4640	2866.09	14092	1602.2
	[mass-%]
gross weight	1	1	1	1	1	1	1	1	1	1	1
residues	0.0398059	0.0535463	0.0812837	0.0108314	0.121086	0.040499	0.0149559	0.0149087	0.0131807	0.00548286	0.0340981
closures	0.0889925	0.0681882	0.109938	0.0779629	0.0723358	0.14847	0.0133954	0.000265212	0.01406	0.170585	0
non-PET	0.0297805	0.035141	0.0291587	0.0297935	0.0379992	0.0201	0.0224327	0.105838	0.0210057	0.0148812	0.0399353
net weight	0.841421	0.843124	0.779619	0.881412	0.768579	0.790931	0.949216	0.878988	0.951754	0.809051	0.925967
sorted rigid PET
	PET total	PET total excl. bev bottles	PET target categories	Bottles total	Trays total	beverage bottles	food bottles	non-food bottles	food mono trays	non-food mono trays	food w/o id trays	food multi trays	PET others
	[g]
gross weight	163727	143828	141070	111384	50690.8	19899.5	41444.1	50040.9	26169.2	3515.8	4424.87	16580.9	1652
residues	1159.2	969.9	1026.76	863.8	256.5	189.3	374.7	299.8	145.062	17.9	25.2384	68.3	38.9
closures	13774.5	12279.4	10686.3	10346.6	3427.91	1495.11	3224.01	5627.5	339.673	0	57.7765	3030.46	0
non-PET	3495.28	2859.81	3388.17	3144.28	316.6	635.474	1407.71	1101.1	139.085	104.8	23.6153	49.1	34.4
net weight	145298	127719	125968	97029.8	46689.8	17579.6	36437.7	43012.5	25545.4	3393.1	4318.24	13433	1578.7
	[mass-%]
gross weight	1	1	1	1	1	1	1	1	1	1	1	1	1
residues	0.00708007	0.00674348	0.00727841	0.00775512	0.00506009	0.0095128	0.00904109	0.0059911	0.00554321	0.0050913	0.00570377	0.0041192	0.0235472
closures	0.0841309	0.0853758	0.075752	0.092891	0.0676238	0.0751329	0.0777918	0.112458	0.0129799	0	0.0130572	0.182768	0
non-PET	0.0213482	0.0198836	0.0240177	0.0282291	0.00624571	0.0319341	0.0339664	0.022004	0.00531482	0.0298083	0.00533695	0.00296124	0.0208232
net weight	0.887441	0.887997	0.892952	0.871125	0.92107	0.88342	0.879201	0.859547	0.976162	0.9651	0.975902	0.810152	0.95563
