# Supplementary material for: Rigid Polyethylene Terephthalate Packaging Waste: An Investigation of Waste Composition and Its Recycling Potential in Austria
Source: MDPI journal article supplement (doi:10.3390/resources12110128), 2023-10-31
Supplement: s1 [file s1 › Table S8_Results - rigid PET packaging waste and circularity potential in Austria for 2020.xlsx]

## Sheet: S8_waste & recycling potential
Supplementary Material
Table S8 - Results - rigid PET packaging waste and circularity potential in Austria for 2020
Calculation schemes, formulas and data applied according to Supplementary material Figure S1, Table S1 and S2.
Results correspond to Figure 6 and Table 4 in the main article.
PET plastic packaging waste & recyclability potential 2020
				PET beverage bottles			rigid PET			PET total			rigid PET target categories [food/non-food bottles & mono trays]			PET rigid target categories incl. beverage bottles			other rigid PET
			units	lower limit	value	upper limit	lower limit	value	upper limit	lower limit	value	upper limit	lower limit	value	upper limit	lower limit	value	upper limit	lower limit	value	upper limit
market volumes	[formulas / indicators]		t		38800	[C]		18369.1			57169.1	6)
collection	[mi collection total]	gross volume	t	28750.7	33824.4	38898	26323.2	30968.4	35613.7	55073.9	64792.8	74511.7	17690.4	20812.2	23934.1	17690.4	20812.2	23934.1	8632.78	10156.2	11679.6
separate collection	[mi separate collection]		t	23803.1	28003.6	32204.2	15478.3	18209.7	20941.2	39281.3	46213.3	53145.3	10729.2	12622.6	14516	10729.2	12622.6	14516	4749.07	5587.15	6425.22
	[ceff]		w-%		0.827912	[C]		0.588009	1)		0.713248			0.606498	5)		0.606498	5)		0.550121
MSW, industrial & bulky waste	[mi other collection]		t	4947.64	5820.76	6693.87	10844.9	12758.7	14672.5	15792.6	18579.5	21366.4	6961.2	8189.65	9418.1	6961.2	8189.65	9418.1	3883.7	4569.06	5254.42
			w-%		0.172088	[C]		0.411991			0.286752			0.393502			0.393502			0.449879
sorting	[mi sorted]	gross volume	t	19724.9	23205.8	26686.7	9483.87	11157.5	12831.1	29208.8	34363.3	39517.8	7331.25	8625	9918.75	7331.25	8625	9918.75	2152.62	2532.49	2912.37
sorting efficiency	[seff]		w-%		0.828671	[B]		0.612721	2)		0.776983			0.683299	8)		0.683299	8)		0.453271
sorting volume incl. beverage bottles		gross volume					10796	12701.2	14606.4	30520.9	35907	41293				8643.4	10168.7	11694	3464.77	4076.2	4687.63
sorting rate = recycling facility input	[SR]		w-%	0.686067			0.410134			0.554182			0.41442			0.488593			0.401351
recycling input	[PETnet]	net volume	t	17425.4	20500.5	23575.5	9611.34	11307.5	13003.6	27036.7	31807.9	36579.1	6575.71	7736.13	8896.55	7736.32	9101.56	10466.8	3035.63	3571.33	4107.03
weighed net indicator nfSO x 100	[nfPET rigid sorted]		w-%		0.88342	3)		0.890267	4)		0.885842			0.896943	7)		0.895055	7)		0.876141
recycling rate input	[rrinput]		w-%	0.606085	0.606085	0.606085	0.365128	0.365128	0.365128	0.490917	0.490917	0.490917	0.249807	0.249807	0.249807	0.293898	0.293898	0.293898	0.115322	0.115322	0.115322
recycling rate total plastic packaging	[rrinput PPW total]		w-%	0.0582516	0.0685313	0.078811	0.0321299	0.0377999	0.0434699	0.0903815	0.106331	0.122281	0.021982	0.0258612	0.0297404	0.0258619	0.0304257	0.0349896	0.0101479	0.0119387	0.0137295
legend
x	other literature
x	calculated values based on other literature
x	calculated and determined values based on results derived from manual sorting analysis
x	sorting volume (gross) PET rigid plus mass of beverage bottles not sorted out previously (based on manual sorting analysis)
collection efficiency / collection rate	mass of separate collected waste in relation to total generated waste based on Van Eygen et al. (2018) [B]
sorting efficiency	mass of sorted plastics in relation to separate collected waste based on Van Eygen et al. (2018) [B]
recycling efficiency	mass of produced regranulate in relation to sorting volume based on Van Eygen et al. (2018) [B]
sorting rate	mass of sorted plastic packaging waste in relation to total generated waste
recycling rate input	recycling net input volumes divided by PET gross volumes waste generation (collection)
recycling rate total plastic packaging	recycling net volumes divided by total plastic packaging waste generation
1)	weighed collection rate (collection efficiency) for PET rigid: 58.8% (based on Van Eygen et al. (2018) [B] for PET bottles 65% and PET others 54.6% - weighting based on gross weight in separate collection (collected rigid PET))
2)	weighed sorting rate for PET rigid: 61.3% (based on Van Eygen et al. (2018) [B] for PET bottles 83% and PET others 24% - weighed based on gross weight PET sorting output excl. Beverage bottles (sorted rigid PET))
3)	net quantity indicator for beverage bottles contained in sorted rigid PET [correspond to Table S-7]
4)	weighed net quantity indicator for sorted rigid PET based on net weight incl. Beverage bottles [correspond to Table S-7]
5)	weighed collection rate for PET rigid target categories (excl. beverage bottles): 60.6% (based on Van Eygen et al. (2018) [B] for PET bottles 65% and PET others 54.6% - weighting based on gross weight)
6)	share for rigid PET assumed according to Packforce (2022) [A] and WKÖ (2021) [C]
7)	weighed net quantity indicator for PET target packaging categories (excl. beverage bottles) contained in sorted rigid PET waste stream - weighting based on net weight [correspond to Table S-7]
8)	weighed sorting rate for PET rigid target categories (excl. Beverage bottles): 68.3% (based on Van Eygen et al. (2018) [B] for PET bottles 83% and PET others 24% - weighed based on gross weight PET sorting output)
References:
[A]	Packforce. Kunststoff-Verpackungen In Österreich: Kreislaufwirtschaft und Nachhaltigkeitsbewertung, Wien, 2022. Available online: https://www.fh-campuswien.ac.at/studium-weiterbildung/aktuell/news-und-events/kunststoff-studie-kreislaufwirtschaft-und-nachhaltigkeitsbewertung.html (accessed on 7 March 2023)
[B]	Van Eygen, E.; Laner, D.; Fellner, J. Circular economy of plastic packaging: Current practice and perspectives in Austria. Waste Manag. 2018, 72, 55–64, doi:10.1016/j.wasman.2017.11.04
[C]	WKÖ. Gesellschaftliche Verantwortung: Nachhaltigkeitsagenda für Getränkeverpackungen, 2021. Available online: https://www.wko.at/service/netzwerke/Umsetzungsberichte_zur_Nachhaltigkeitsagenda_und_zur_Zusat.html (accessed on 16 March 2023)
